# Supplementary material
Source: PubMed Central journal article supplement (PMC2852982)

## Supplementary data

### *Fig. S1*

Compiled local sequence alignments of Lhs1, Sse1 and Ssa1 (Ssa1 only for the NBD sequences). Annotations according to Fig. 1. Degree of conservation for residues as indicated. Boxed residues represent known Hsp70 NBD contact points in Sse1 (see Fig. 1).

### *Fig. S2*

Difference in deuterium incorporation between monomeric Ssa1 NBD and NBD in complex with Lhs1 (*A* and *C*) or Sse1 (*B* and *D*) at indicated HX time points. The two datasets each for Lhs1 and Sse1 were resolved to individual but partially redundant peptic peptides as indicated by the start and end residue numbers of the corresponding segments. Some points in *A* and *B* were initially measured with a lower Lhs1 concentration. In later measurements (*A*, *B*, *C* and *D*) 10-fold higher concentrations were used to compensate for the apparent lower affinity that Lhs1 displays towards the Ssa1 NBD compared to Sse1.

## Fig. S1

**SS**

**Lhs1** MRNVLRLFLTAFAIGSLA--AVLGV<sup>21</sup>VDYQQNIKAIVVSPQAPLELVLTP<sup>326</sup>EAKRKEISGLSIKRLPGY<sup>327</sup>GKDDPN<sup>328</sup>GIERI  
**Sse1** MSTPFG<sup>329</sup>LDLGN--NNSVLAVARNRGIDIVVNEVSNR-----STPSVVGFGPK-----NRY  
**Ssa1** MSKAVGIDLGT-TYSCVAHFANDRVDIIANDQGNR-----TTPSFVAF<sup>330</sup>TDT-----ERL  
.:.\*.\*. . . . : : : . . : \* : . . : : \*

YGS<sup>331</sup>AVGSLATRF<sup>332</sup>PQNTLLHLKPLL<sup>333</sup>GKSLEDET<sup>334</sup>TVTLYSKQH<sup>335</sup>PGLEMVSTNRS--TIAFLV  
LGETGK<sup>336</sup>NKQTSNI<sup>337</sup>KNTVANL<sup>338</sup>KRIIGLDYHHPDFEQESKHFTSKL<sup>339</sup>VELDDKKTGA<sup>340</sup>EVRFAG  
IGDA<sup>341</sup>AKNQAA<sup>342</sup>MNPSNTV<sup>343</sup>FD<sup>344</sup>AKRLIGRNF<sup>345</sup>NDPEVQADM<sup>346</sup>KHFPFKLIDV<sup>347</sup>DGK<sup>348</sup>PQ-IQVE<sup>349</sup>FKG  
\*.: . : .\*: . \* :\*: . . . : : \* : . : : \*

DNVEYPLEELVAMNVQEIANRANSELLKDRDARTEDFVNKMSFTIPDFDQHQ<sup>350</sup>RKALLDAS  
EKHVFSATQLAAMFIDKVKDTVKQDTKAN-----ITDVCIAVPPWYTEQRYNIADAA  
ETKNFTPEQISSMVLGKMKETAESYLGA<sup>351</sup>K-----VND<sup>352</sup>AVVTVPAYFND<sup>353</sup>SQRQATK<sup>354</sup>DAG  
:. . . : : \* : : : . . . : . . :\*: : : \*\* \*\*.

SIT<sup>355</sup>TGIEETYLVSE<sup>356</sup>GMSVAVNVFLK<sup>357</sup>QRQFPPGEQQ--HIYIVDMGSGS<sup>358</sup>SIKASMF<sup>359</sup>SILQPE  
RIAG-LNPVRIVNDVTAAGVSYGIFKTDLPGE<sup>360</sup>E<sup>361</sup>EKPRIVAFVDIGHSSYTC<sup>362</sup>SIMAFK<sup>363</sup>KG-  
TIAG-LNVLRIINEPTAAAIAYGLDK---KGKEE---HVLIFDLGGT<sup>364</sup>FDVSL<sup>365</sup>LSIEDG-  
\* : : : : : : : : : : \* : : : \* : \* : : \* : : .

DTTQPV<sup>366</sup>TIEFEGYGYNPHLGGAKFTMDIGSLIENK<sup>367</sup>FLETHPAIR<sup>368</sup>TDELHANPKALAKINQ  
-----QLKVLGTACDKHFGGRDFDLAITEHFADEFKTKY---K<sup>369</sup>DI<sup>370</sup>RENPKAYN<sup>371</sup>RLT  
-----IFEVKATAGDTHLGGEDFDNRLVNHFIQEFK<sup>372</sup>RKN---KKDLSTNQ<sup>373</sup>RALRL<sup>374</sup>RT  
: . . . : \* : \* . \* : . : : \* . . : : \* : \* : :

**326 327**

A<sup>375</sup>AEKAKLILSANSEASINIESLINDIDFRTSITRQEFEEFIADSLDDIVK<sup>376</sup>PINDAVTKQF  
A<sup>377</sup>EK<sup>378</sup>LK<sup>379</sup>VL<sup>380</sup>SAN<sup>381</sup>NAPFSVESVMNDVDVSSQLSREELEELVKP----LLERVTEPVTKAL  
ACERAKRTLSSSAQTSVEIDSLFEGIDFYTSITRARFEELCAD----LFRSTLDPVEKVL  
\*.\*: \* \*\*: : : : : : \* : : : \* : \* : : : : . . : . \* \* :

**280 281**

GGYGTNLPEINGVILAGSSRIPVQDQLIKLVSEKVLRLNNADES<sup>415</sup>AVNGVVMRGIKLSN<sup>416</sup>SFK **438**  
AQAKLSAE<sup>417</sup>EVDFVEIIGGTTRIP<sup>418</sup>TLKQ<sup>419</sup>SISEAF-GKPLST<sup>420</sup>TE<sup>421</sup>LNQ<sup>422</sup>DEAIAKGA<sup>423</sup>AFICA<sup>424</sup>HSPTLRVP **391**  
RDAKLDK<sup>425</sup>QVDEIVLVGGSTRIPKVQKLVTDYFNGKEPNRSINPDEAVAYGA<sup>426</sup>VQAAILT  
 . : : : : \* : \* \* : . . . : : \* : \* \* : \* \* . .

**365 367**

**Lhs1** 439 TKPLNVVDRSVNTYSFKLSNESELYDVFTRGSAYPNKTSILNTTDSIPNNFTIDLFGENG  
**Sse1** 392 FKFEDIHPYSVSYSYWDKQVDEEDHMEVFPAGSSFPSTKLITLNRGTGDFSMAASYDTITQL  
 : \*\* \* :.: :\*: \*\*:\*. \* \* \*... : : :  
 Loop  
 KLFETITVNSGAIKNSYSSDKCSSGVAYNITFDLSSDRLFSIQEVNCICQSENDIGNSKQ  
 PPNTPEQIANWEITGVQLPEGQDS-VPVKLKLRCDFPSGLHTIEEAYTIEDIEVEEPIPLP  
 . : . \*. . :. \* \* :.: ... \*.:\* \* \* : \* : .  
 IKN-KGSRLA-----FTSEDVEIKRLSPSER 583  
 EDAPEDAEEQFKKVTKTVKKDDLTIVAHFTGLD 543  
 . :.: . ...\*: \* : .  
 50% conservation

**SBD $\alpha$**

```

Lhs1      584 -SRLHEHIKLLD--KQDKERFQFQENLNIVIEISNLYDARNLLMDDVEVMQNGPKSQVEELS
Sse1     544 AKKLNELIEKENEMLAQDKLVAETEDRKNLTLEEYITLTRG-KLEEEYAPFASDAEKTQLQ
          .:::* *: : *** : ::.**: * . :::* ..... :*.
                                     572 575
EMVKVYLDWLEDASFDTDPEDIVSRIREIGILKKKIELYMSAKEPLNSQQFKGMLEEGRH
GMLNKAEEWLYDEGFDSIKAKYIAKYEELASLGNIIR-----GRYLAKKEEEK
*:~ ~ ~ ~ ~*:~ ~ ~ ~ ~.:::.*:~ ~ ~ ~ ~.:::.*:~ ~ ~ ~ ~
                                     56% conservation
KLLQAI 705 * - single, fully conserved residue
QAIRSK 656 : - conservation of strong groups
        : : . - conservation of weak groups
        : : - no consensus
    
```

Fig. S2

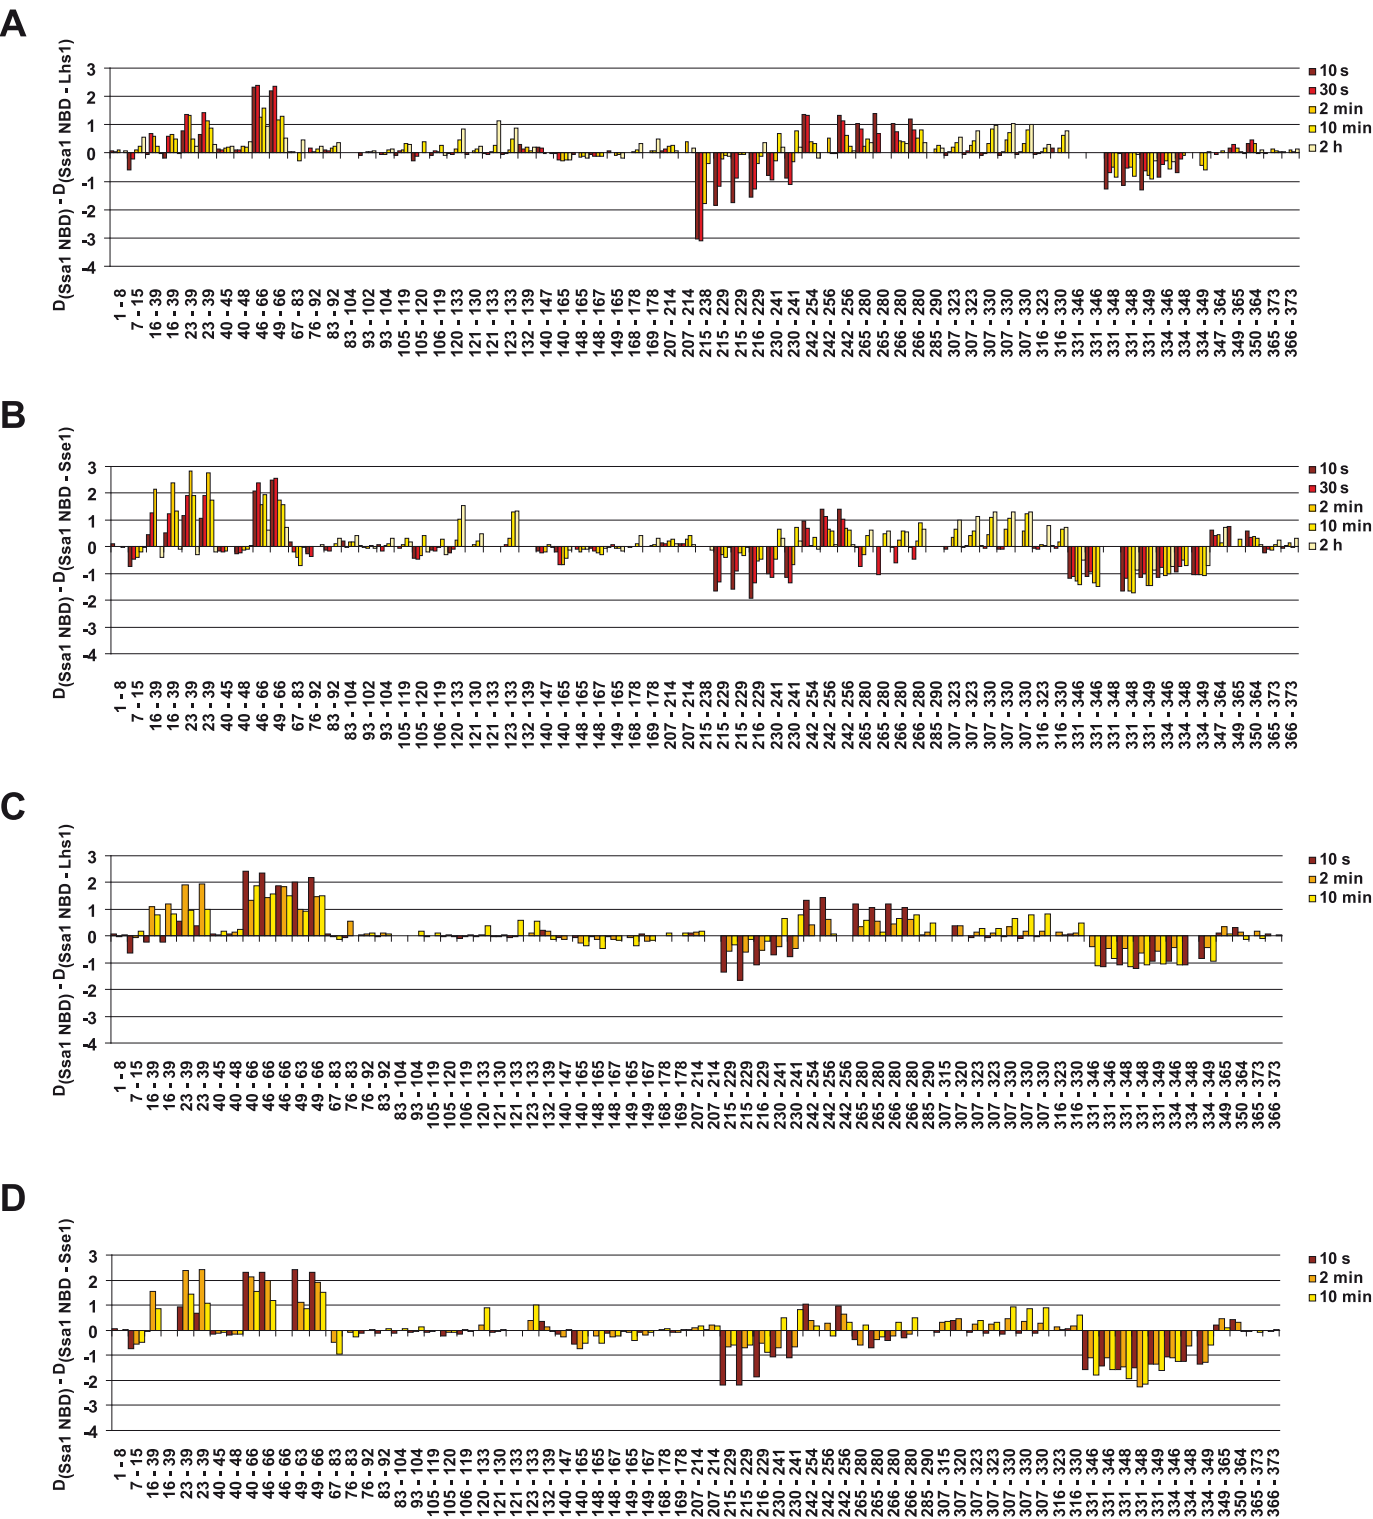

Supplement: supp_M109.096735_jbc.M109.096735-1.pdf [file supp_M109.096735_jbc.M109.096735-1.pdf]
